# Supplementary material for: Tailoring the molecular design of twisted dihydrobenzodioxin phenanthroimidazole derivatives for non-doped blue organic light-emitting devices
Source: Royal Society of Chemistry journal article supplement (doi:10.1039/c8ra05004j), 2018-01-01

### Supporting information

**Tailoring molecular design of twisted dihydrobenzodioxin phenanthroimidazole derivatives for non-doped blue organic light emitting devices**

**Jayaraman Jayabharathi\*, Ramaiyan Ramya, Venugopal Thanikachalam, Pavadai Nethaji**

*Department of Chemistry, Annamalai University, Annamalainagar 608 002, Tamilnadu, India*

\* Address for correspondence

Dr. J. Jayabharathi  
Professor of Chemistry  
Department of Chemistry  
Annamalai University  
Annamalai nagar 608 002  
Tamilnadu, India.  
Tel: +91 9443940735  
E-mail: jtchalam2005@yahoo.co.in

## Contents

1. Scheme S1
2. Figures S1-S9

**Scheme S1.** Synthetic route for fused polycyclic aryl dihydrobenzodioxin phenanthrimidazoles.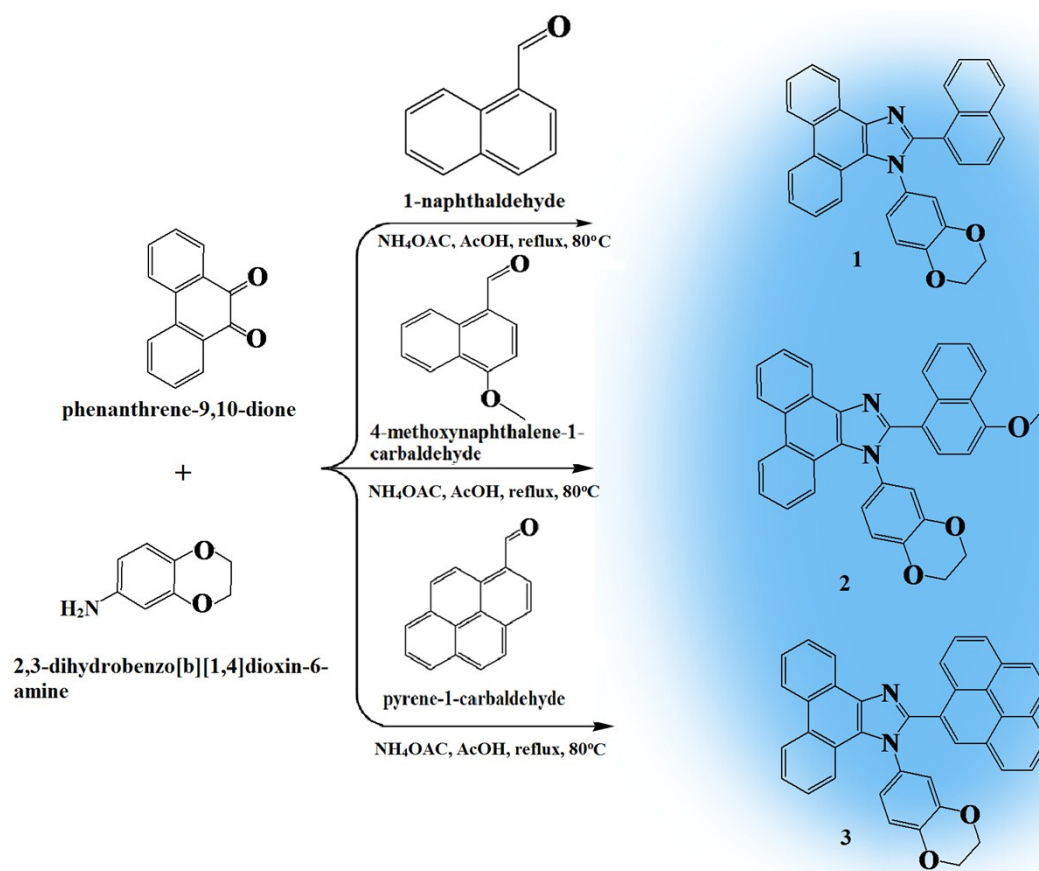

Figure S1:  $^1\text{H}$  NMR spectrum of naphthyl dihydrobenzodioxin phenanthrimidazole (1)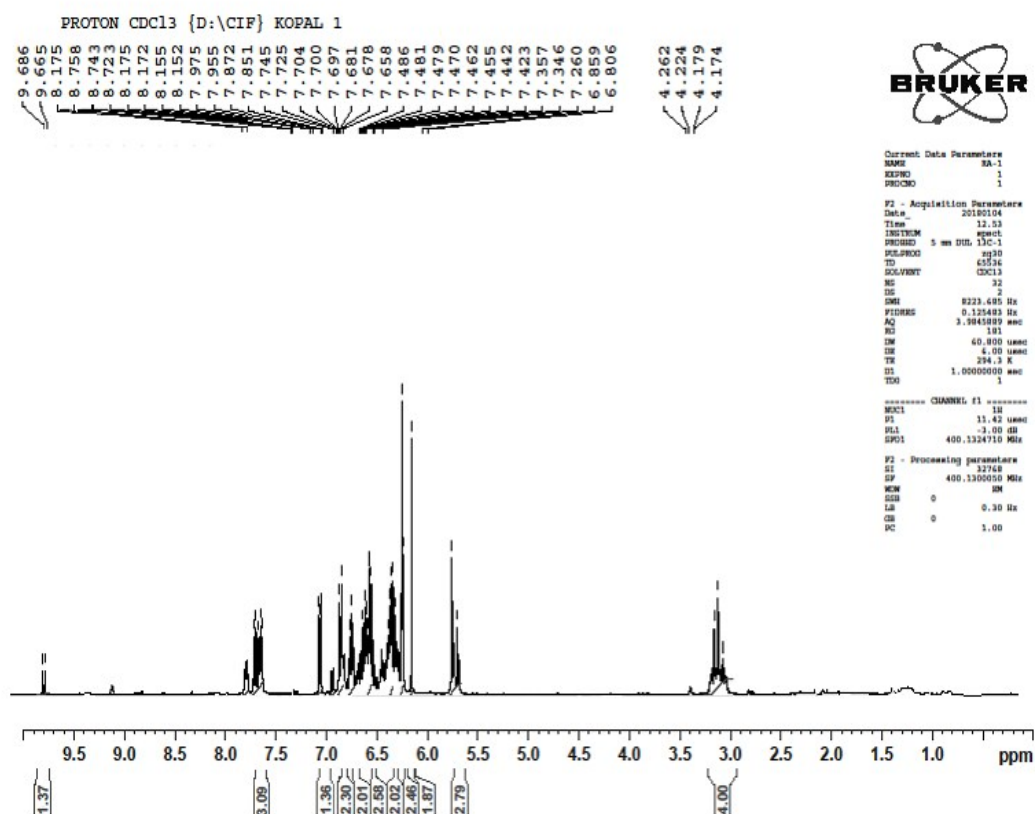Figure S2:  $^1\text{H}$  NMR spectra of methoxynaphthyl dihydrobenzodioxin phenanthrimidazole (2)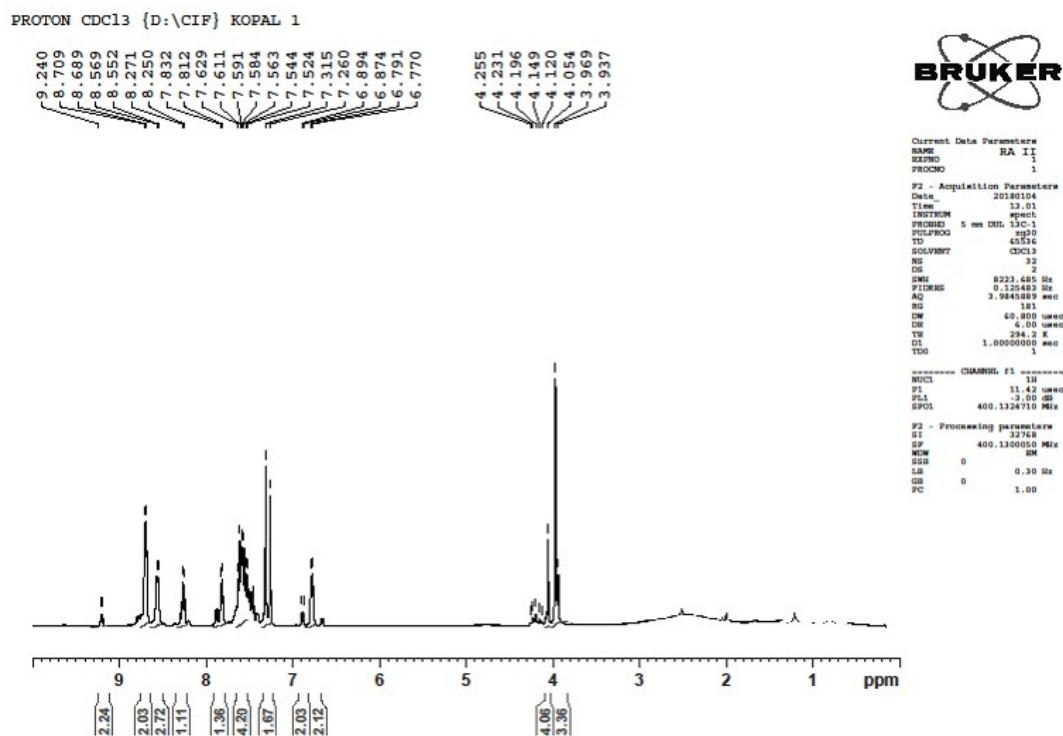

Figure S3:  $^1\text{H}$  NMR spectrum of pyrenyl dihydrobenzodioxin phenanthrimidazole (3)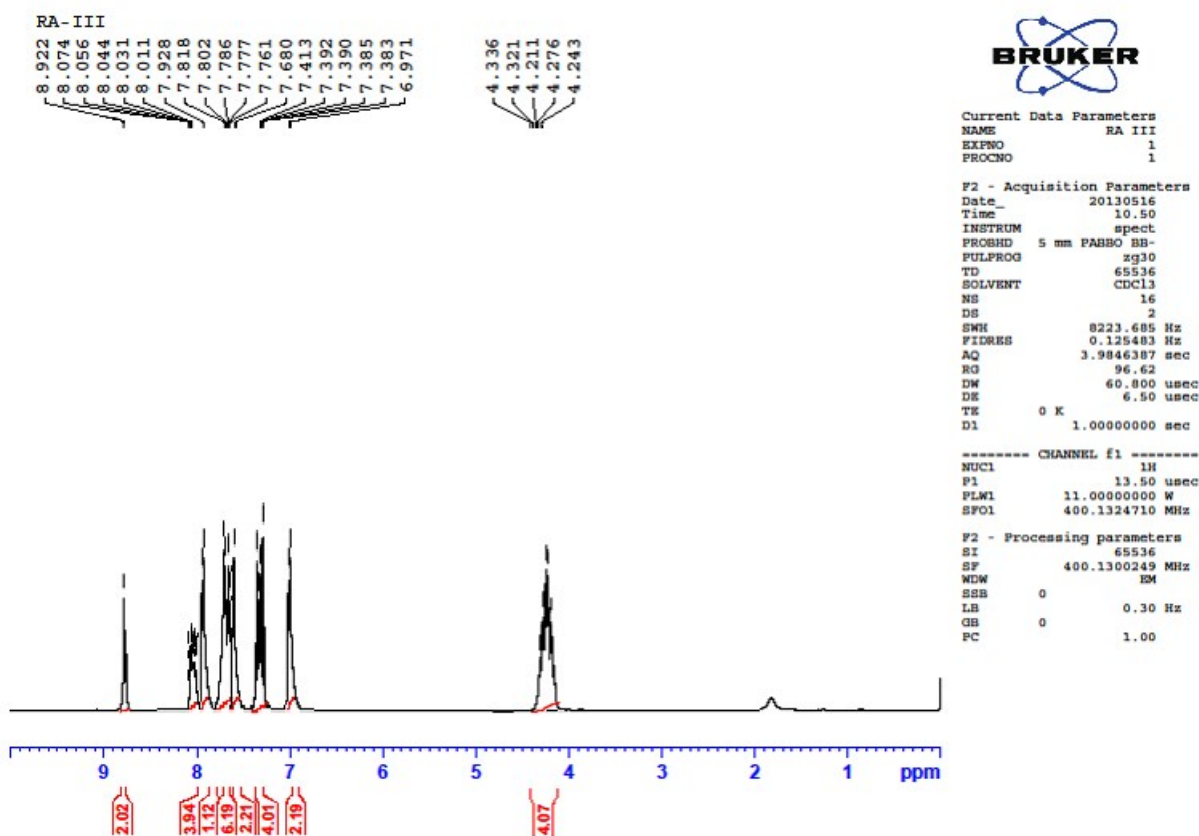Figure S4:  $^{13}\text{C}$  NMR spectrum of naphthyl dihydrobenzodioxin phenanthrimidazole (1)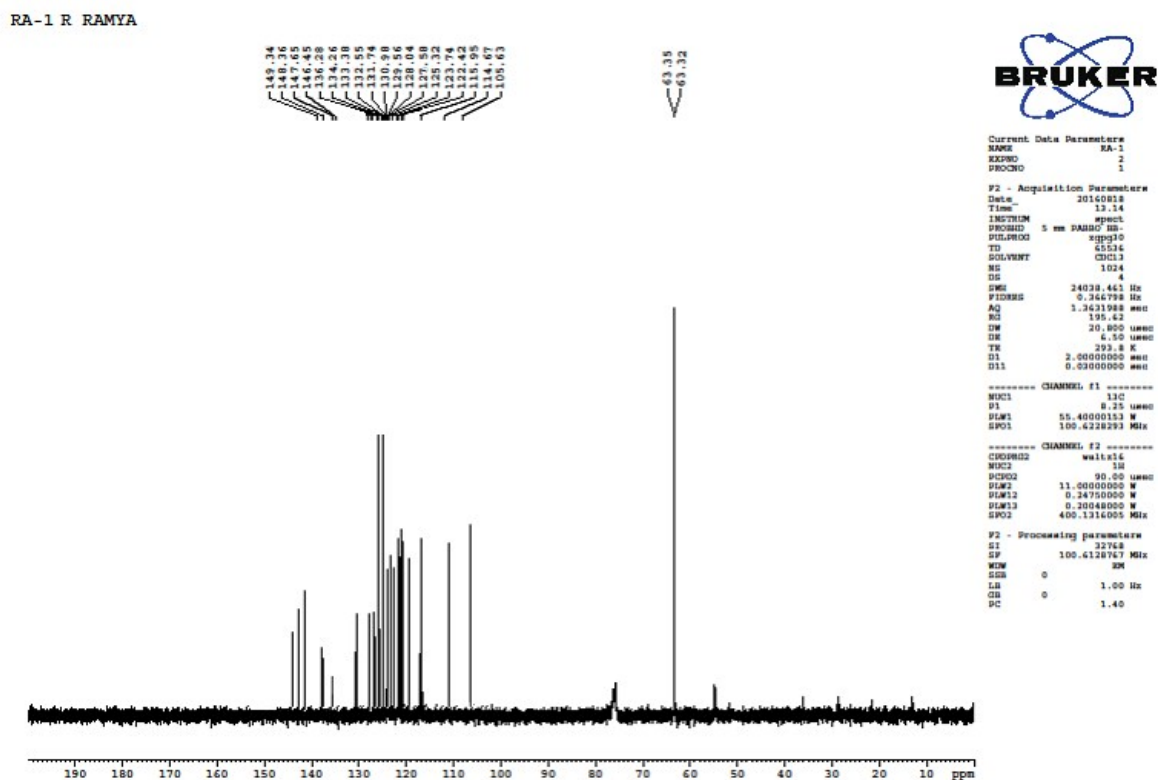

Figure S5:  $C^{13}$ NMR spectrum of methoxynaphthyl dihydrobenzodioxin phenanthrimidazole (2)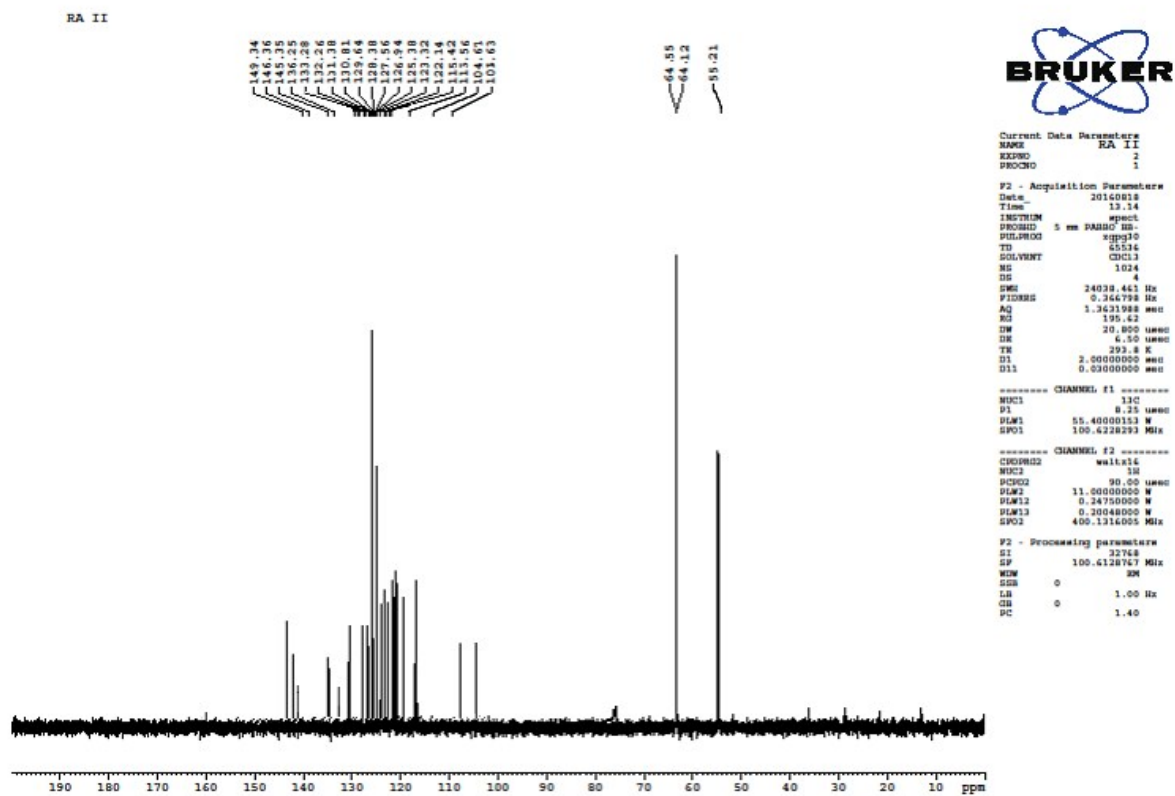Figure S6:  $C^{13}$ NMR spectrum of pyrenyl dihydrobenzodioxin phenanthrimidazole (3)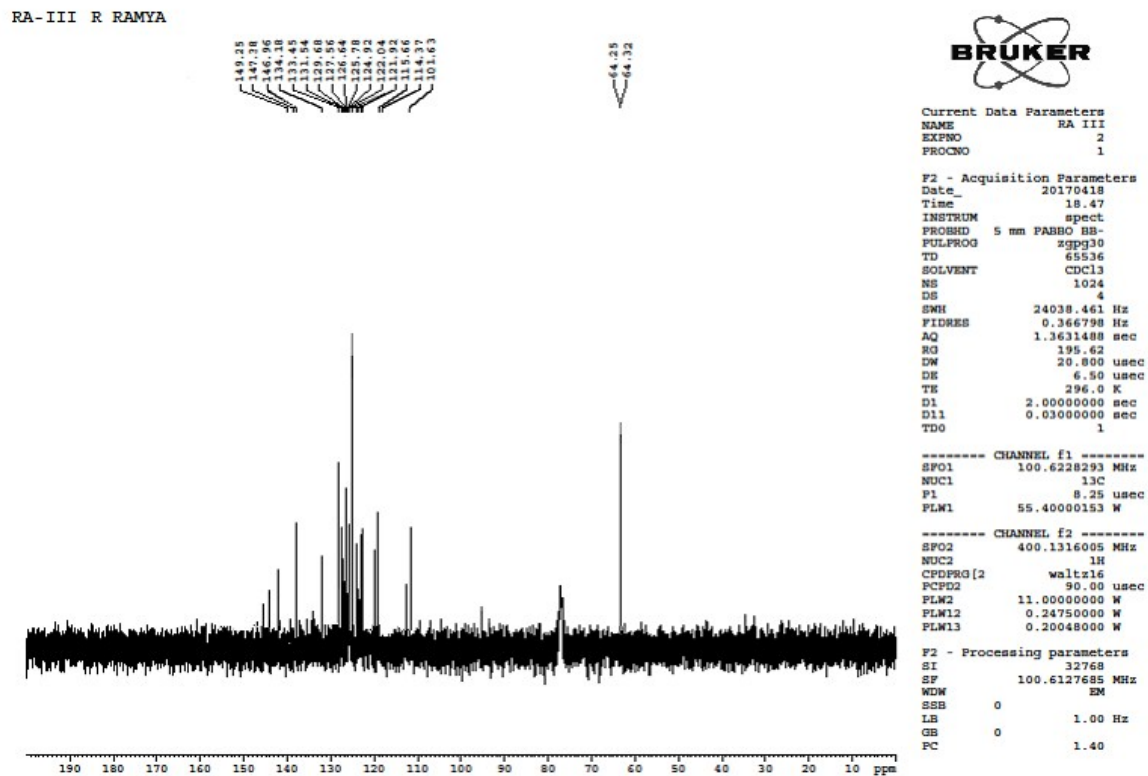

**Figure S7: Mass spectrum of naphthyl dihydrobenzodioxin phenanthrimidazole (1)**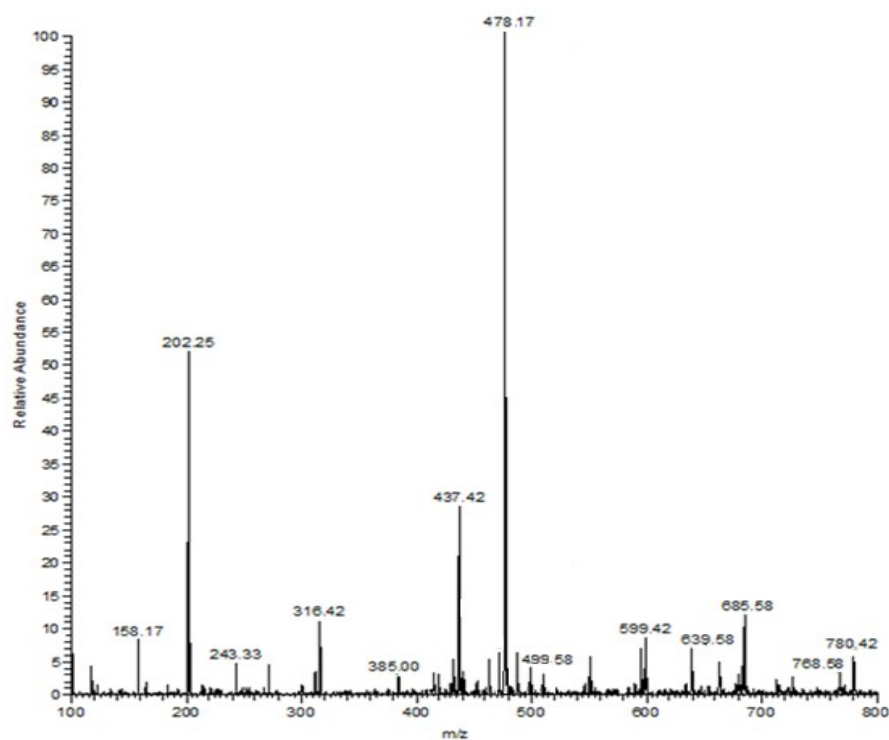**Figure S8: Mass spectrum of methoxynaphthyl dihydrobenzodioxin phenanthrimidazole (2)**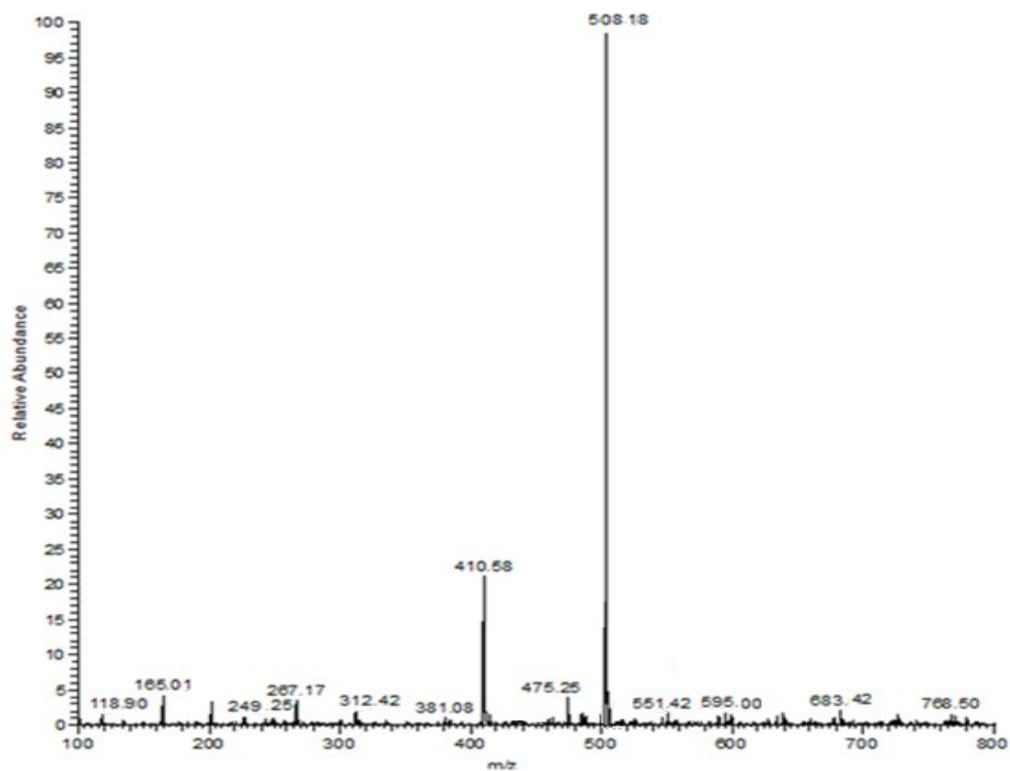

**Figure S9: Mass spectrum of pyrenyl dihydrobenzodioxin phenanthrimidazole (3)**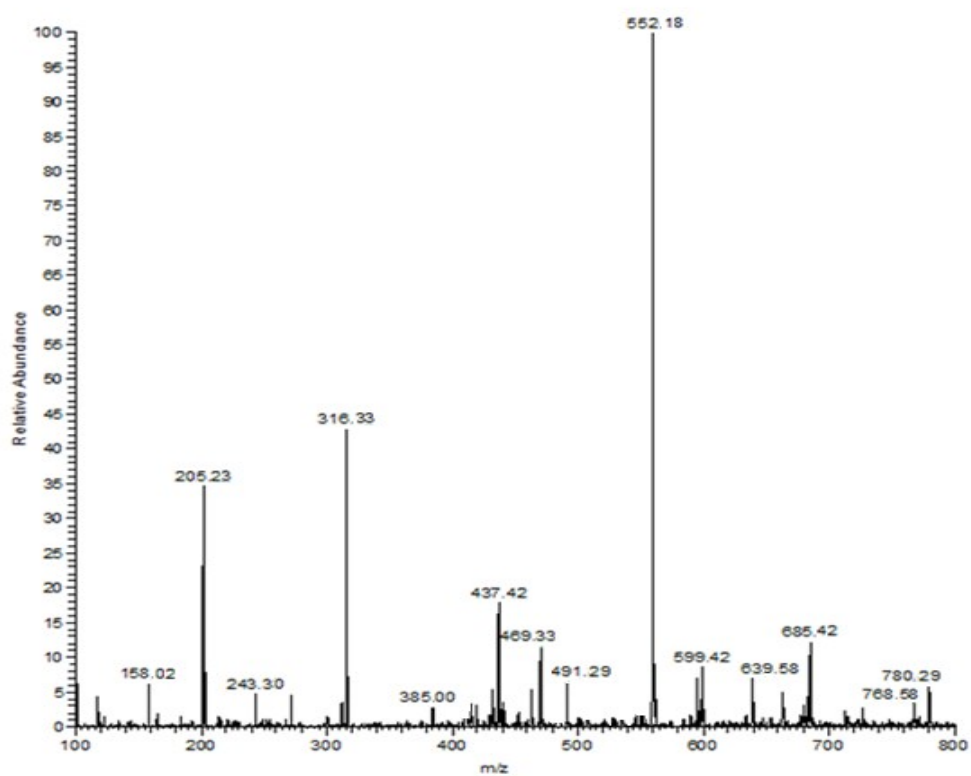

Supplement: c8ra05004j1.pdf [file c8ra05004j1.pdf]
